# Supplementary material for: Perceptions of Family Health History in an East Baltimore Community
Source: Research Square preprint supplement (doi:10.21203/rs.3.rs-5915151/v1), 2025-02-06
Supplement: Supplementary file 1 [file 46305fae401b042d2078b373.pdf]

# History of Family Health History Discussion, Collection, and Genetic Testing

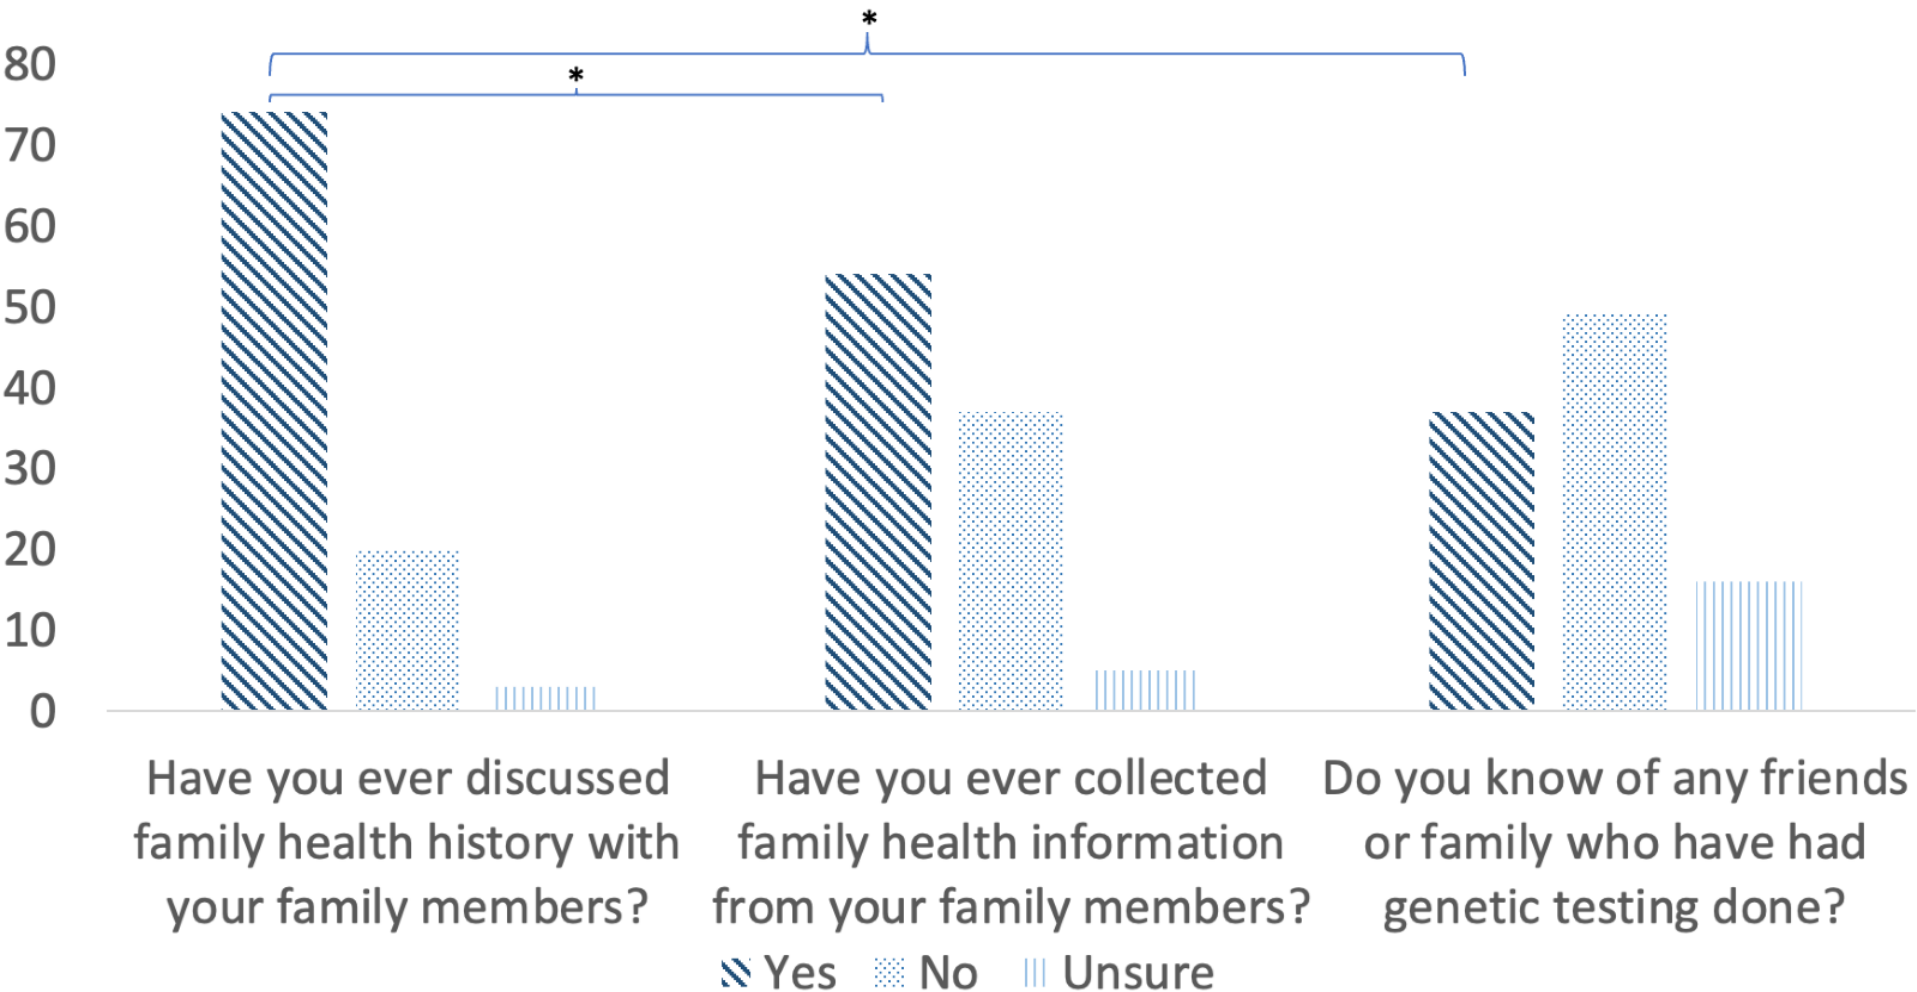

**Fig. 1** History of FHH discussion, collection, and knowledge of genetic testing in social networks. Values are percentages of participants (n=97, n=96, n=95). There are significant differences (\*= p<.05, chi-squared) between the proportion of those answering yes to discussing FHH and answering yes to collecting or knowing of genetic testing

# Attitudes Towards Family Health History and its Advocacy

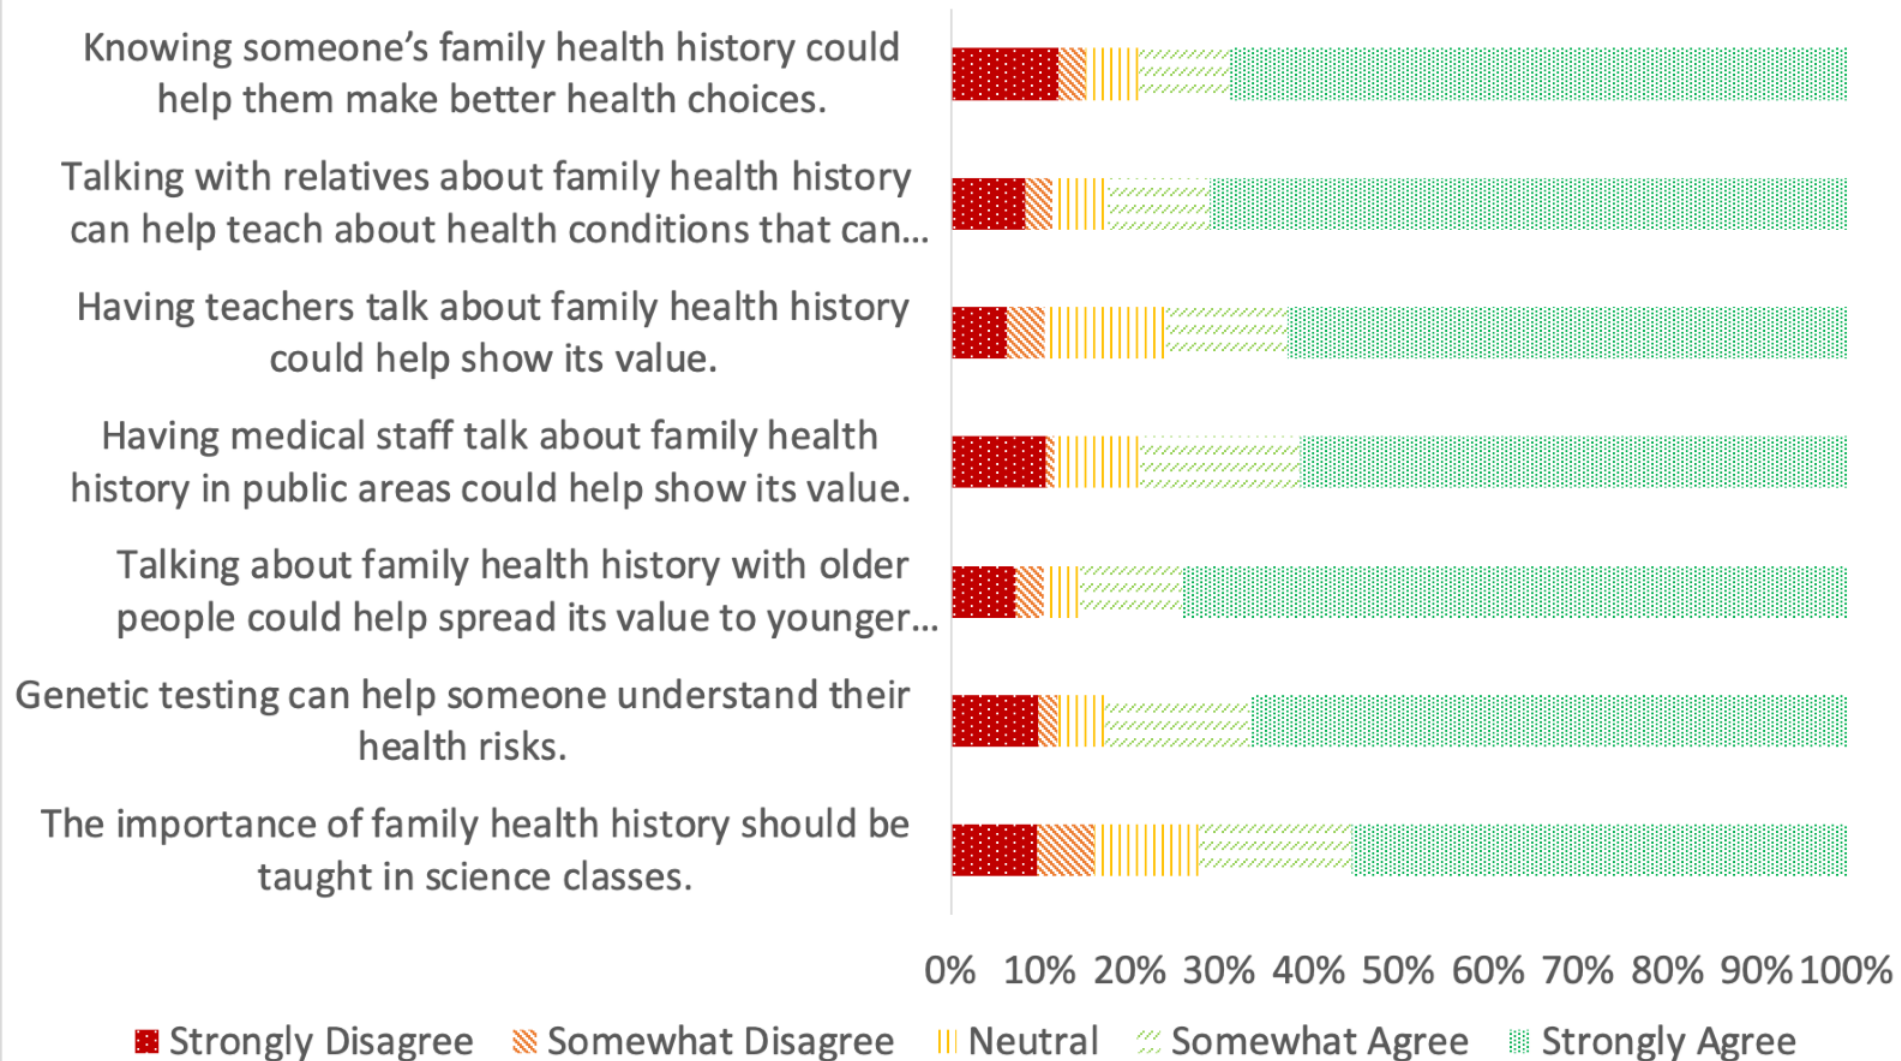

**Fig. 2** Attitudes towards FHH and its advocacy. Values are percentage of participants (n=101) based on their Likert scale answer from strongly disagree to strongly agree
